# Supplementary material for: Phosphorylation of GSK3α/β correlates with activation of AKT and is prognostic for poor overall survival in acute myeloid leukemia patients
Source: PubMed Central journal article supplement — BBA Clin. 2015 Jul 23;4:59–68. doi: 10.1016/j.bbacli.2015.07.001 (PMC4661707; doi:10.1016/j.bbacli.2015.07.001), 2015-07-23
Supplement: mmc2.pdf [file mmc2.pdf]

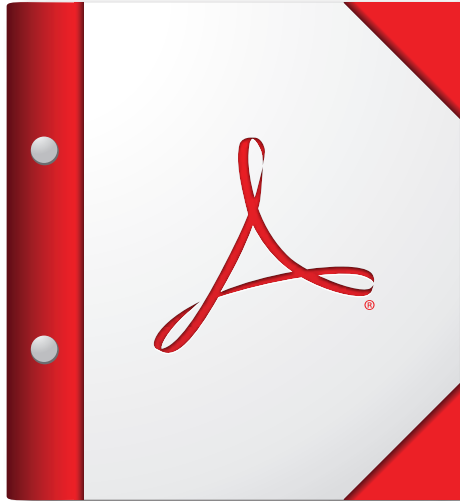

**For the best experience, open this PDF portfolio in  
Acrobat 9 or Adobe Reader 9, or later.**

[Get Adobe Reader Now!](#)
